# Supplementary figures and images for: Malaria parasite liver stages render host hepatocytes susceptible to mitochondria-initiated apoptosis
Source: PubMed Central journal article supplement — Cell Death Dis. 2013 Aug 8;4(8):e762–. doi: 10.1038/cddis.2013.286 (PMC3763448; doi:10.1038/cddis.2013.286), 2013-08-08

# Supplemental Figure 1

Uninfected

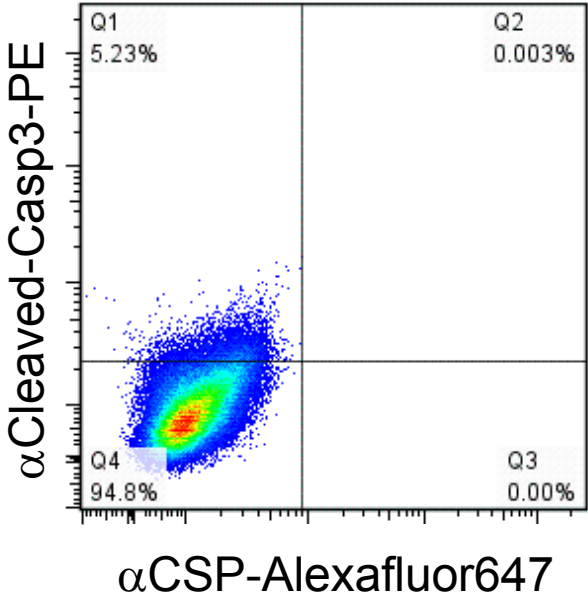

Infected

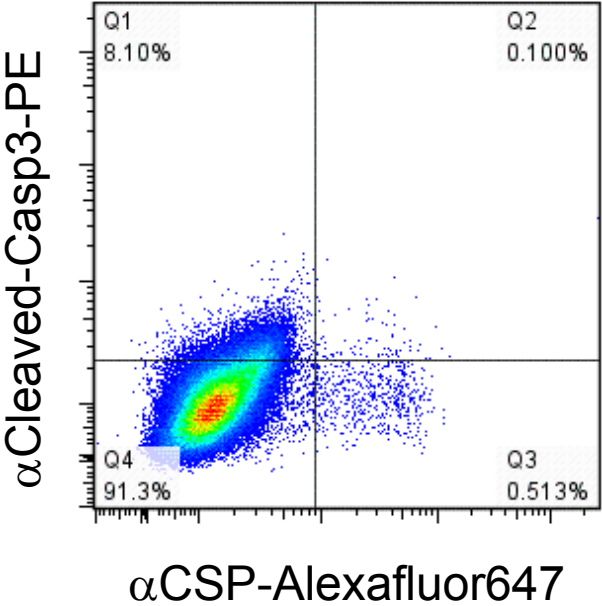

Supplement: cddis2013286x1.pdf [file cddis2013286x1.pdf]

# Supplemental Figure 2

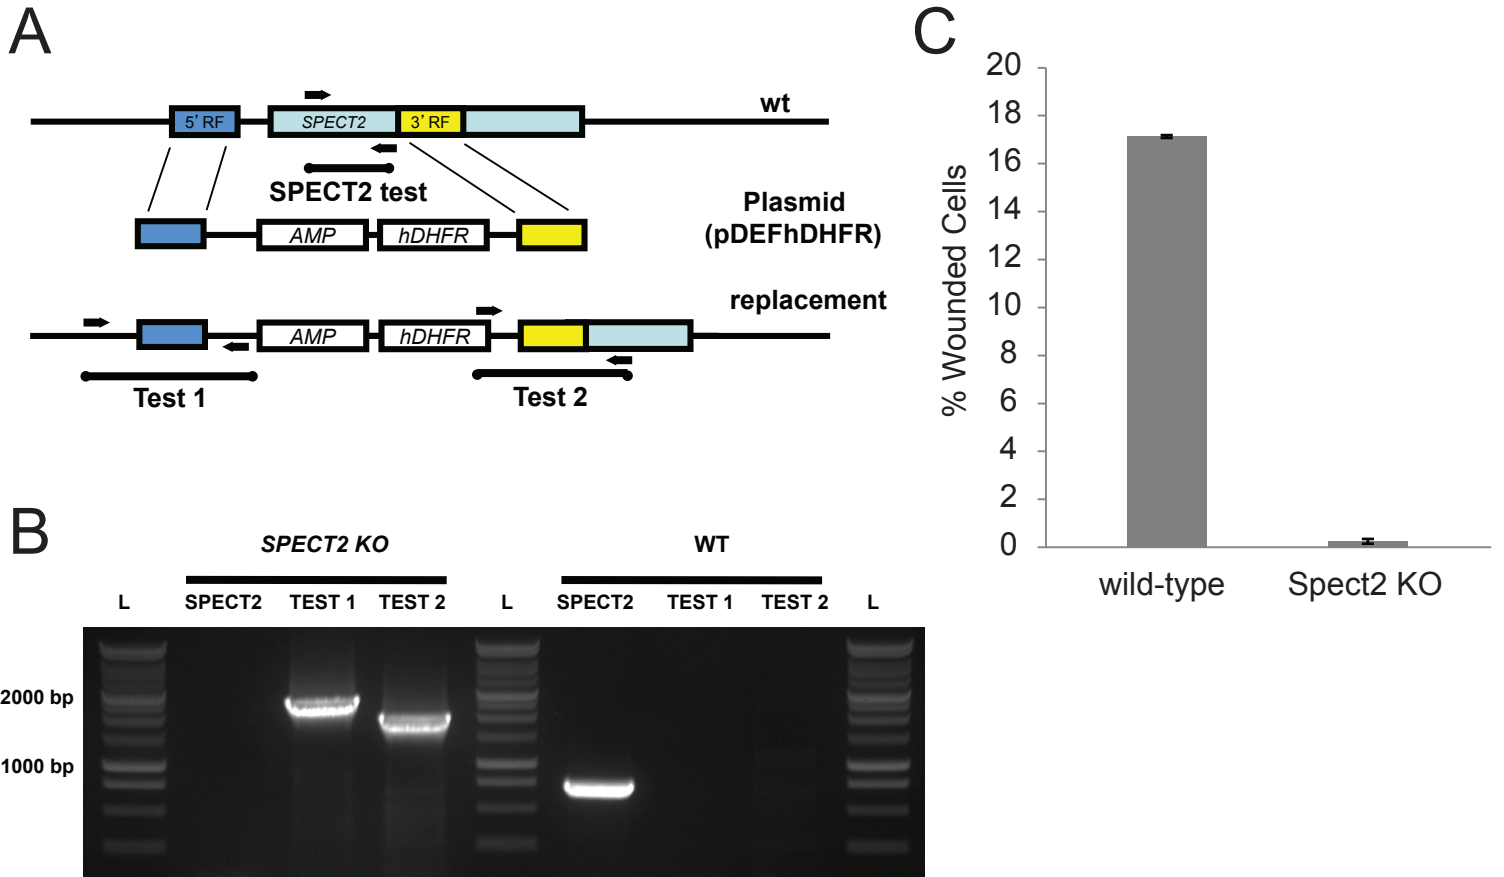

Supplement: cddis2013286x2.pdf [file cddis2013286x2.pdf]

# Supplemental Figure 3

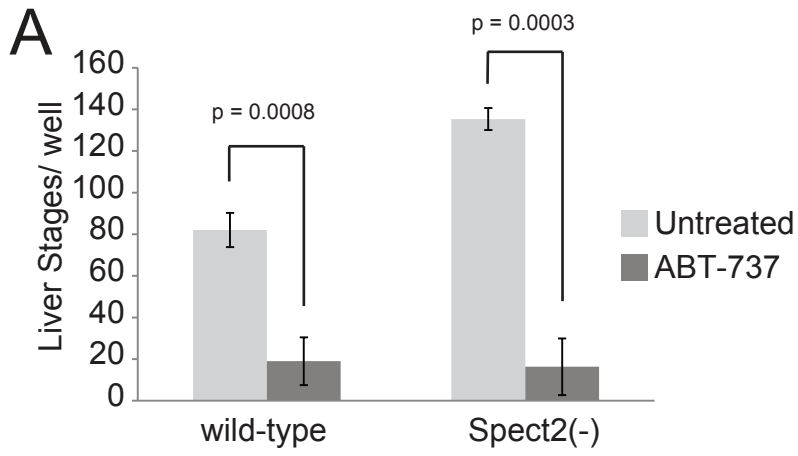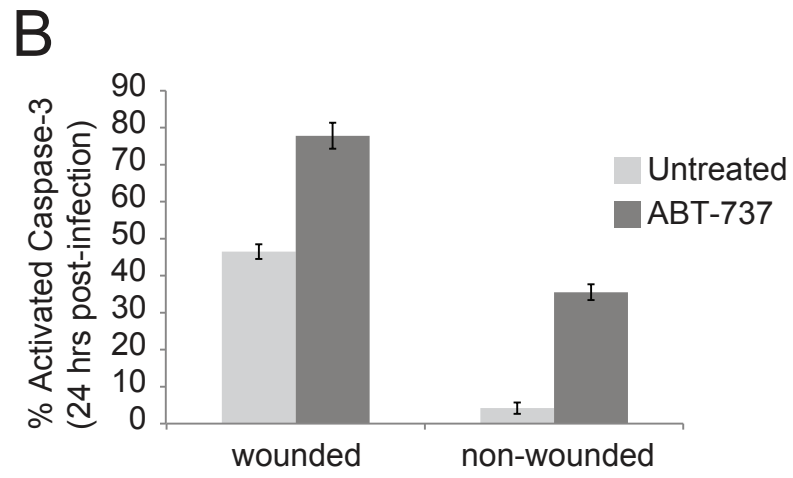

Supplement: cddis2013286x3.pdf [file cddis2013286x3.pdf]
